# Supplementary material for: Brain-Sparing Methods for IMRT of Head and Neck Cancer
Source: PubMed Central journal article supplement (PMC4364536; doi:10.1371/journal.pone.0120141), 2015-03-17
Supplement: pone.0120141.s004.pdf [file pone.0120141.s004.pdf]

| <b>Structure</b>       | <b>Dose statistic</b> | <b>Optimal</b> | <b>Required</b> |
|------------------------|-----------------------|----------------|-----------------|
| PTV1 edited            | Dose to 99%           |                | > 58.5 Gy       |
| PTV1 edited            | Dose to 95%           |                | > 61.8 Gy       |
| PTV1 edited            | Dose to 50%           |                | 65 +/- 1 Gy     |
| PTV1 edited            | Dose to 2 %           |                | < 69.5 Gy       |
| PTV2 edited            | Dose to 99%           |                | > 48.6 Gy       |
| PTV2 edited            | Dose to 95%           |                | > 51.3 Gy       |
| PTV2 edited            | Dose to 50%           |                | 54 +/- 1 Gy     |
| Bilateral parotids     | Mean dose             | < 24 Gy        | < 30 Gy         |
| Superficial parotids   | Mean dose             | < 24 Gy        | < 30 Gy         |
| Spinal cord            | Maximum point dose    |                | < 46 Gy         |
| Spinal cord PRV        | Maximum point dose    |                | < 48 Gy         |
| Brain stem             | Maximum point dose    |                | < 50 Gy         |
| Brain stem PRV         | Maximum point dose    |                | < 55 Gy         |
| Optic chiasm           | Maximum point dose    |                | < 54 Gy         |
| Bilateral optic nerves | Maximum point dose    |                | < 55 Gy         |
| Bilateral lens         | Mean dose             |                | < 6 Gy          |
